# Supplementary material
Source: MDPI journal article supplement (https://www.mdpi.com/2073-4468/9/4/66)
Supplement: s1 [file s1]

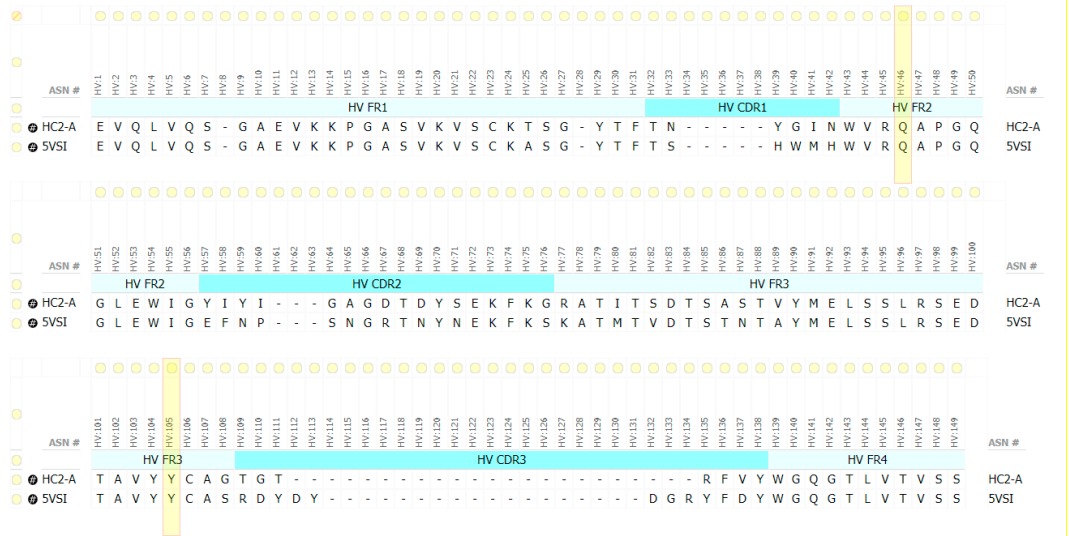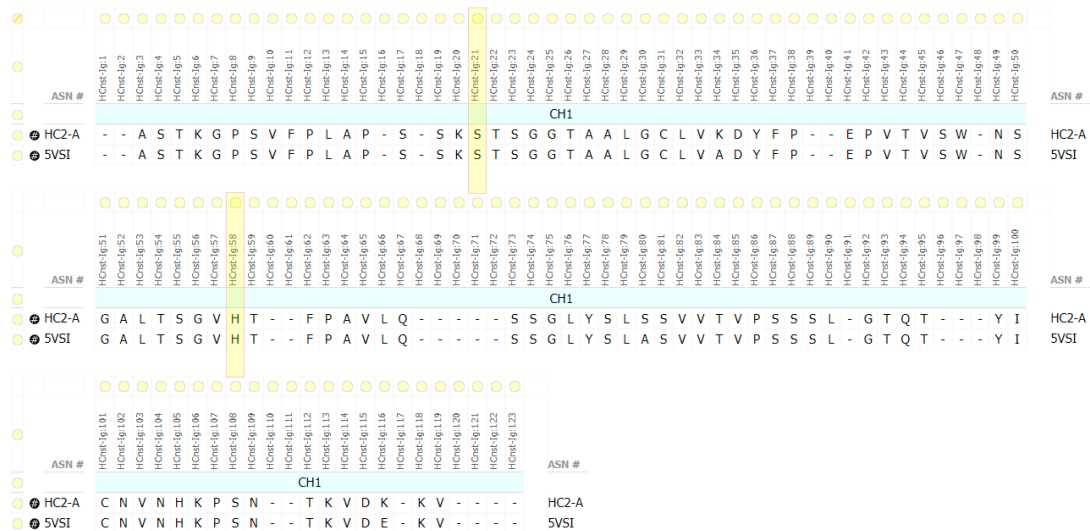

**Figure S1.** Sequence alignment for the heavy chain constant (C<sub>H</sub>1) and variable (V<sub>H</sub>) regions for HC2- A and 5vsi. Residues that engage in interfacial domain (C<sub>H</sub>1-C<sub>H</sub>1, V<sub>H</sub>-V<sub>H</sub>) contacts in common to both HC2-A and 5vsi are highlighted in yellow.
